# Supplementary figures and images for: Assessment of need and practice for assistive technology and telecare for people with dementia—The ATTILA (Assistive Technology and Telecare to maintain Independent Living At home for people with dementia) trial
Source: PubMed Central journal article supplement — Alzheimers Dement (N Y). 2019 Sep 3;5:420–30. doi: 10.1016/j.trci.2019.07.010 (PMC6728826; doi:10.1016/j.trci.2019.07.010), 2019-09-03

Public Assessor Value Networks

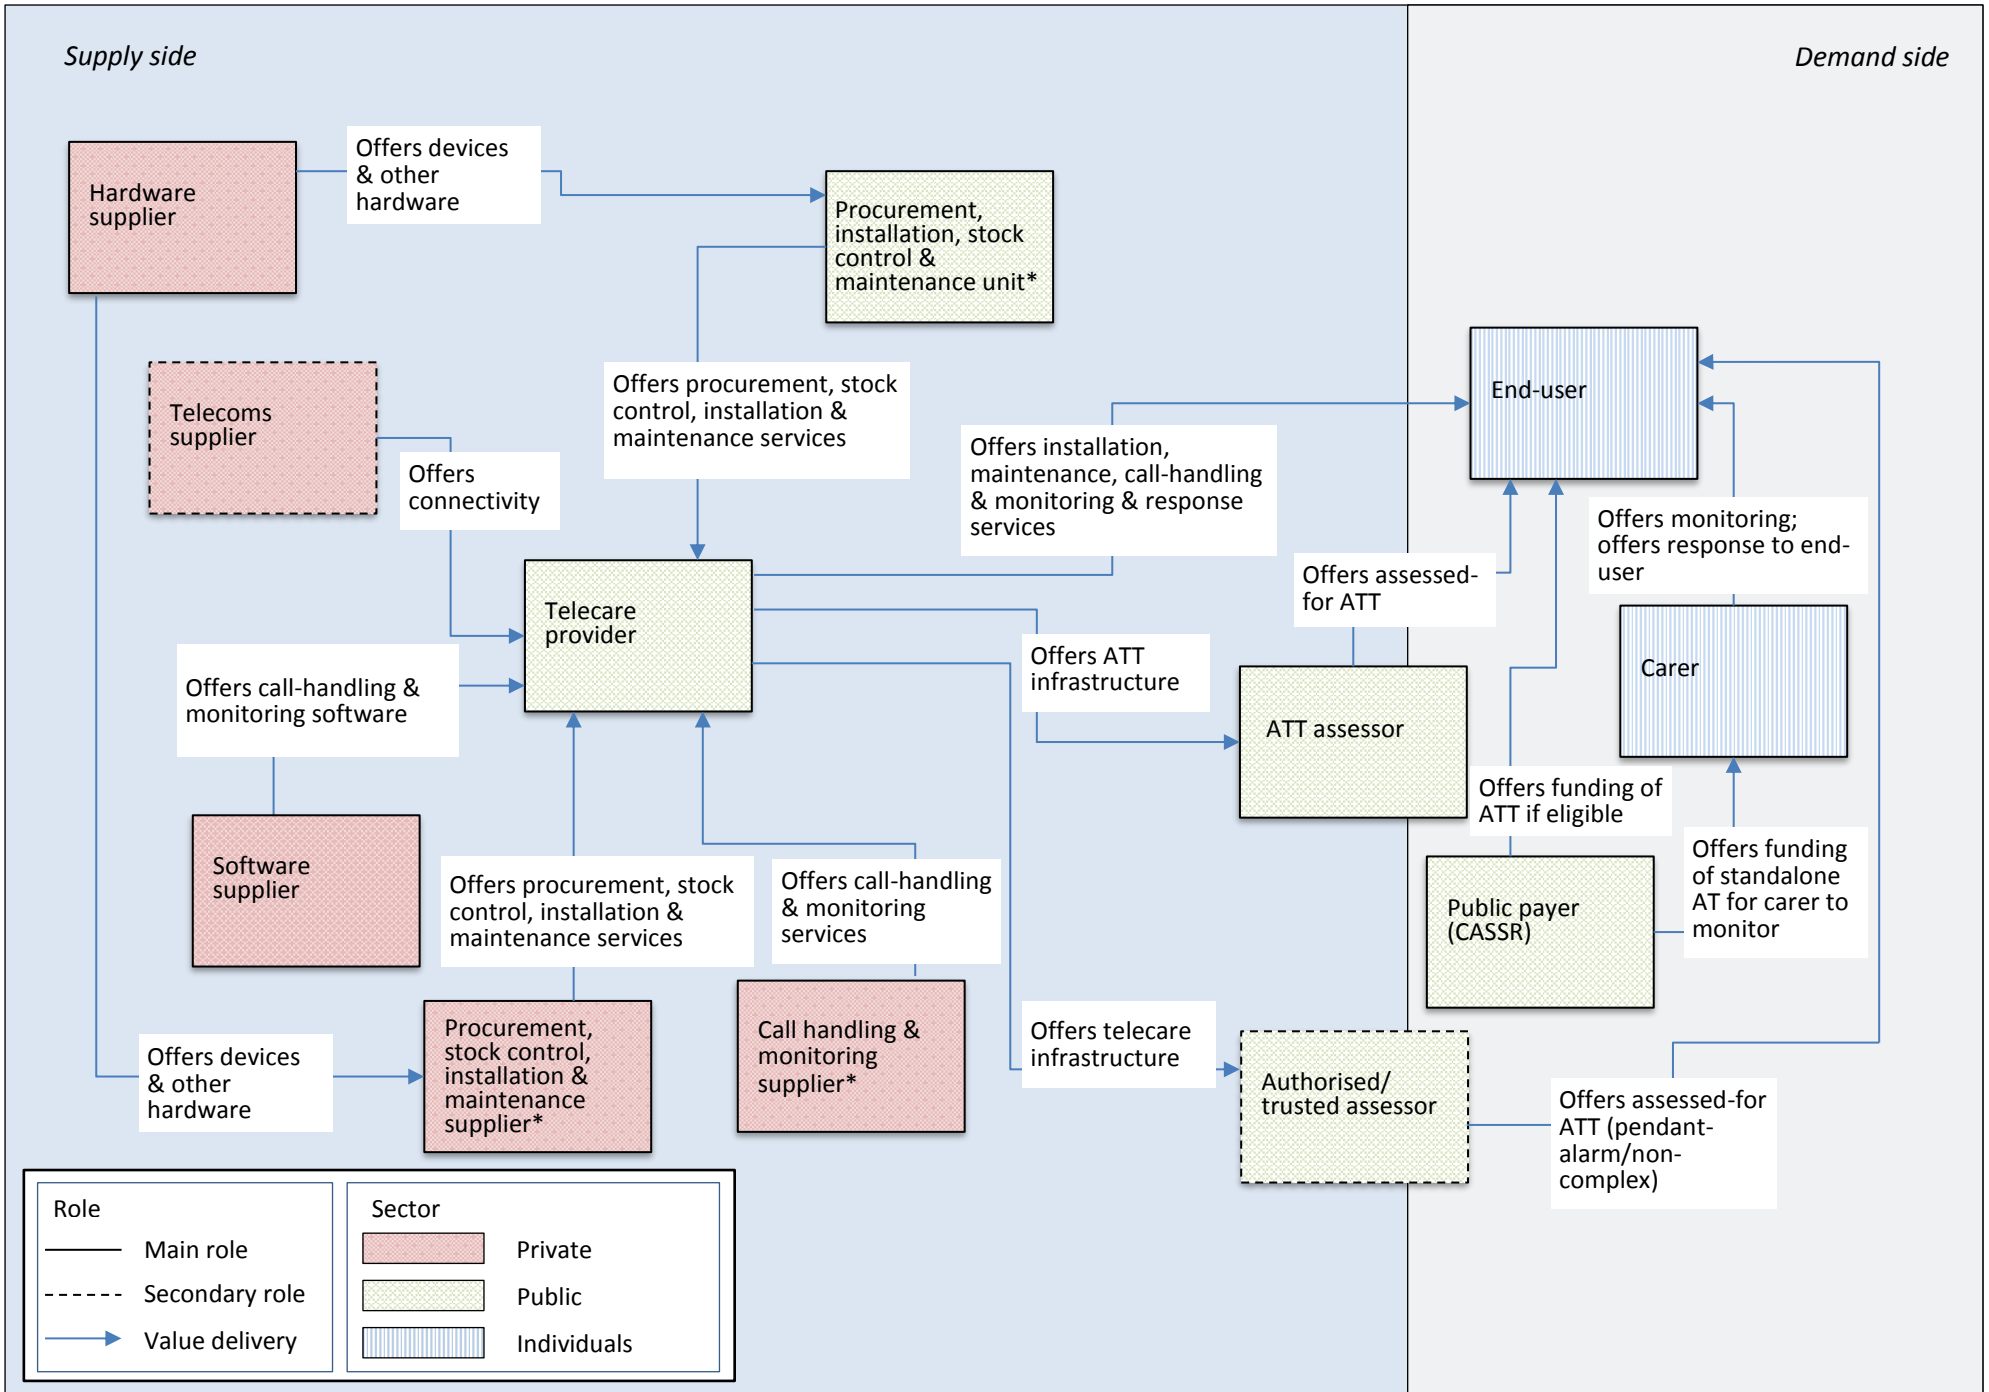

Supplement: mmc3.pdf [file mmc3.pdf]

# Not-for-profit (NFP) Value Networks

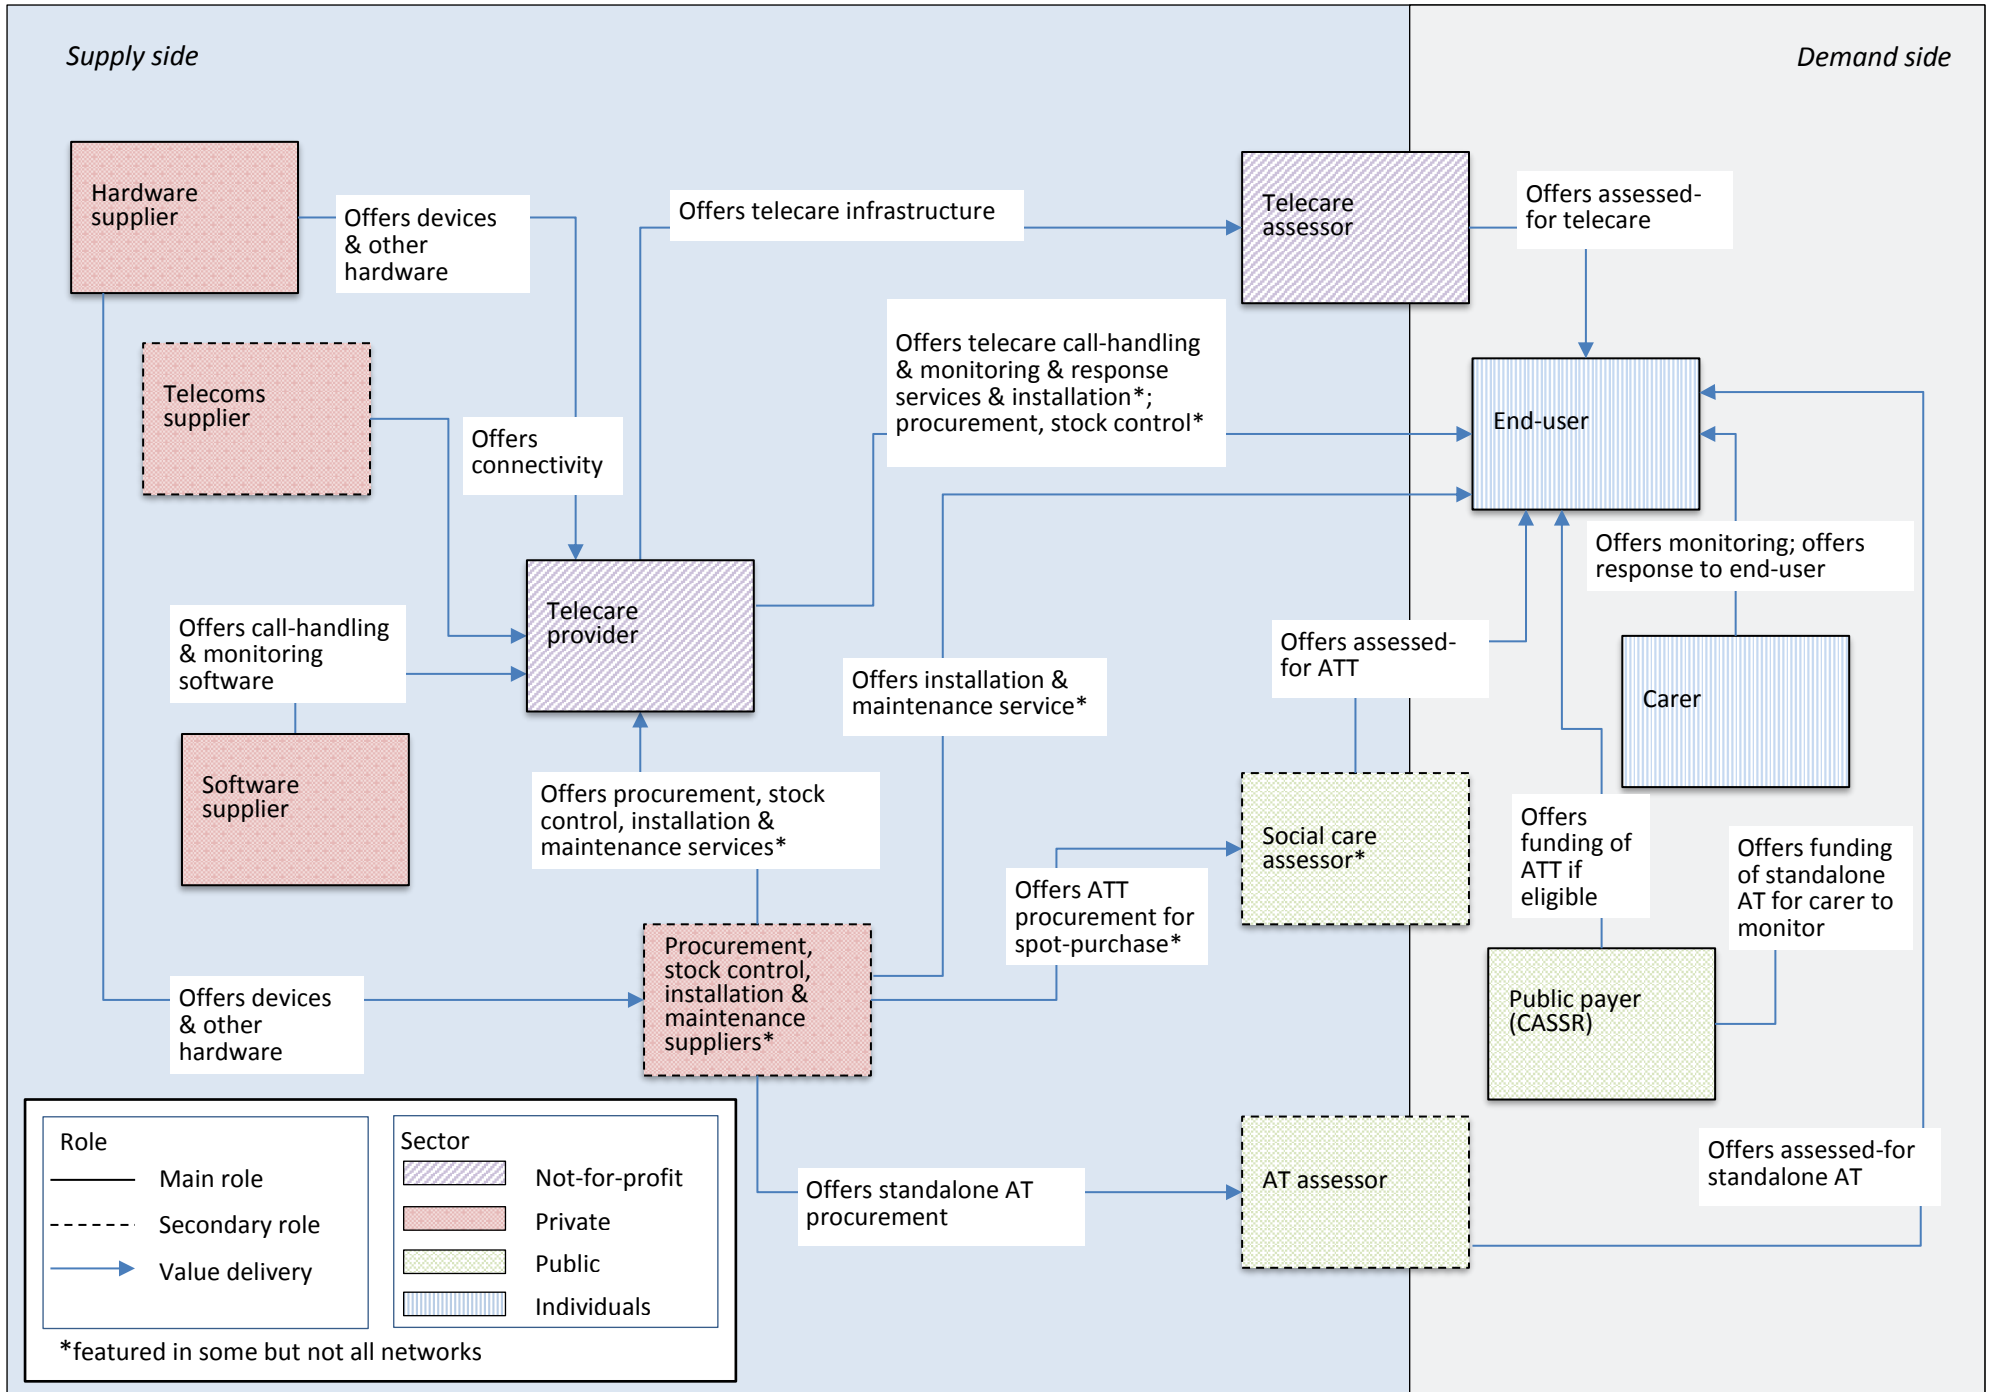

Supplement: mmc4.pdf [file mmc4.pdf]
